# Supplementary material for: Proteo-Genomic Analysis Identifies Two Major Sites of Vulnerability on Ebolavirus Glycoprotein for Neutralizing Antibodies in Convalescent Human Plasma
Source: PubMed Central journal article supplement (PMC8322977; doi:10.3389/fimmu.2021.706757), 2021-07-16
Supplement: DataSheet_1.pdf [file DataSheet_1.pdf]

A

EBOV-1130

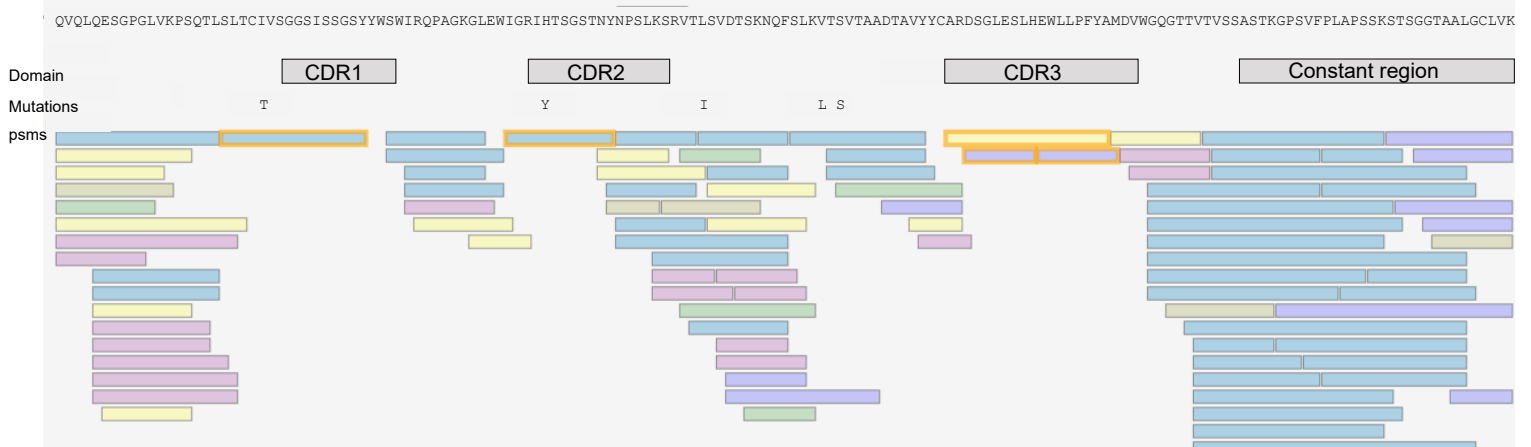

B

EBOV-1131

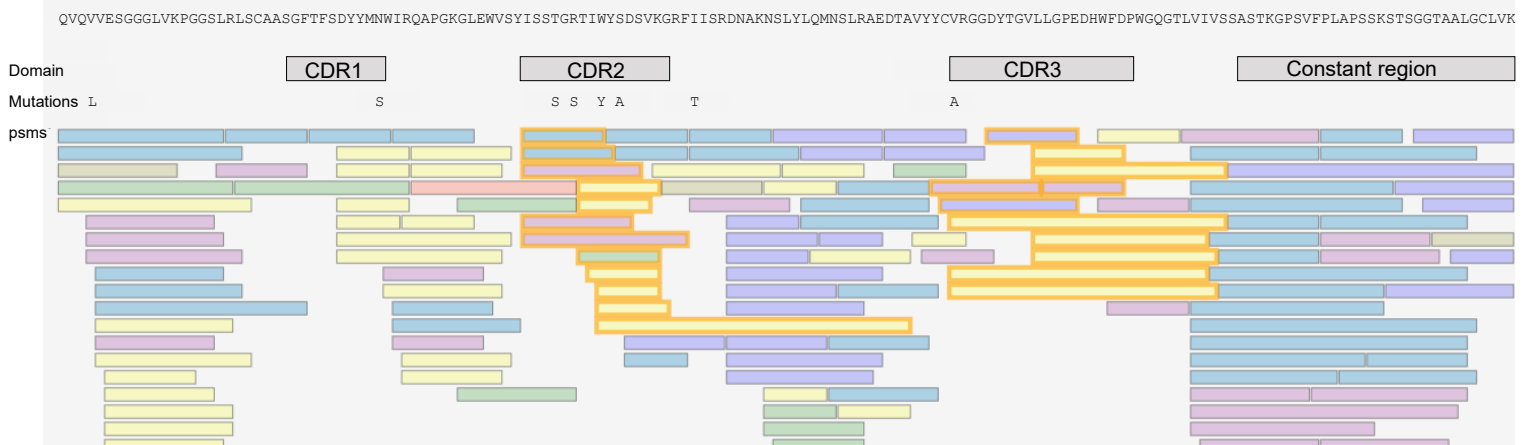

C

EBOV-1181

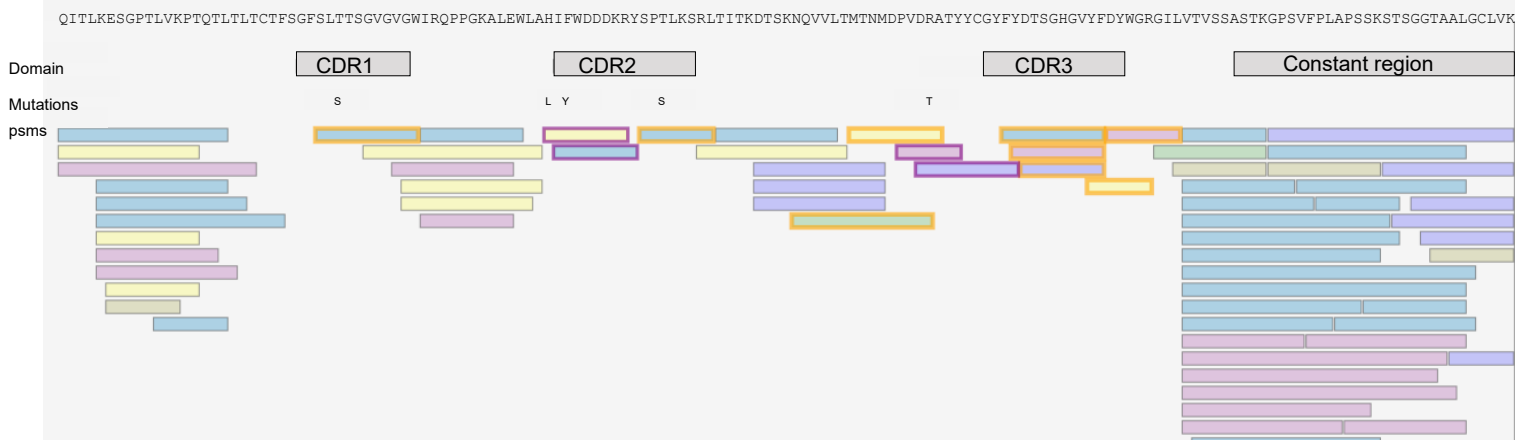

**Supplementary Figure 1. Identification of mAb sequences in convalescent plasma using proteogenomics analysis.** Peptide coverage maps that were created for each of three memory B cell sequences ([**panel A**] EBOV-1130; [**panel B**] EBOV 1131; [**panel C**] EBOV-1181) by searching the mass spectra against memory B cell sequences dataset are shown. Alicanto analysis software was used to generate maps of peptide coverage; maps of three identified heavy chain variable region sequences are shown as examples. The germline residues for the classified variable gene identifications (defined as “Mutations”) and positions of CDR1, CDR2, or CDR3 regions (defined as “Domain”) are shown. Each identified spectrum was assigned a peptide sequence defined as peptide-spectrum matches (PSMS), and identical peptides are represented by a single box. The color of each rectangle corresponds to the enzymatic cleavage reaction from which that peptide originated: trypsin (green), chymotrypsin (light blue), pepsin (light pink), elastase (yellow), ArgC (tomato/dark pink), LysC (olive), or GluC (dark red). Gold outline of the rectangle indicates the peptide maps that are unique to that single antibody variable region sequence. The peptide maps unique to that antibody CDR1-CDR3 clone (*i.e.*, concatenating CDR1+CDR3 and uniquely clustering on those regions define the CDR1-CDR3 clone) are shown with purple outline.

**Supplementary Table 2.** Peptides for CDR3 of heavy and light chain variable regions identified by proteo-genomic approach

|                    | Rank* | CDR3                  | # peptides |
|--------------------|-------|-----------------------|------------|
| <b>Heavy chain</b> | 1     | VRGGDYTGVLGPEHWFDP    | 15         |
|                    | 2     | GYFYDTSGHGYYFDY       | 5          |
|                    | 3     | ARDSGLESLHEWLLPFYAMDV | 3          |
|                    | 4     | ARDPTYSSGWRDY         | 2          |
|                    | 5     | AKGGIWF               | 1          |
| <b>Light chain</b> | 1     | QQYGSSPRT             | 10         |
|                    | 2     | QQAKSFPLT             | 9          |
|                    | 3     | QQAKSYPIT             | 8          |
|                    | 4     | MQALQTPLT             | 8          |
|                    | 5     | QQYYSTPRT             | 7          |
|                    | 6     | QQRSNWPFT             | 7          |
|                    | 7     | QQYNSYPFT             | 6          |
|                    | 8     | QQAKSPIT              | 6          |
|                    | 9     | MQALQTPIT             | 6          |
|                    | 10    | QQYGSSPLT             | 6          |
|                    | 11    | QQYDSSPWT             | 5          |
|                    | 12    | MQGRETPRT             | 5          |
|                    | 13    | MQALQTPRT             | 5          |
|                    | 14    | QQANSFPQT             | 5          |
|                    | 15    | QQRSRWPLT             | 4          |
|                    | 16    | QKYNSAPFT             | 4          |
|                    | 17    | QQYDNLPLT             | 4          |
|                    | 18    | QQYNNWLPWT            | 4          |
|                    | 19    | QVWHSIGDQQV           | 4          |
|                    | 20    | QKYNSAPWT             | 3          |
|                    | 21    | QQYNNWPPTWT           | 3          |
|                    | 22    | QQYYSTPWT             | 3          |
|                    | 23    | QKYNSAPLT             | 3          |
|                    | 24    | QQRDKWPLT             | 3          |
|                    | 25    | QQYNSYPWT             | 3          |
|                    | 26    | QQYYSAPRT             | 3          |
|                    | 27    | QYTNSFPLT             | 3          |
|                    | 28    | QQYYSIPWT             | 3          |
|                    | 29    | QQRTSWPPLT            | 3          |
|                    | 30    | QQYDNPPLT             | 3          |
|                    | 31    | QQYNNWPRT             | 3          |
|                    | 32    | QQRSNWPHT             | 2          |
|                    | 33    | QQRTRNPPLFT           | 2          |
|                    | 34    | QSADRSPTYVV           | 2          |
|                    | 35    | QQSYSTPIT             | 2          |
|                    | 36    | QQRSNWPCT             | 2          |
|                    | 37    | QQYDSWPRT             | 2          |
|                    | 38    | QKYDSAPWT             | 2          |
|                    | 39    | QQSYSTLCT             | 1          |
|                    | 40    | QQRASWPPEIT           | 1          |
|                    | 41    | QQYYSIP               | 1          |
|                    | 42    | QQTYSTPTWT            | 1          |
|                    | 43    | QKYNSAPLT             | 1          |
|                    | 44    | QQRSNRFT              | 1          |
|                    | 45    | QQYGNPVT              | 1          |
|                    | 46    | QQYNSYSQT             | 1          |
|                    | 47    | QQSYTRRT              | 1          |
|                    | 48    | QEYKTWT               | 1          |

\*Ranking is based on identified peptide count for peptides covering the CDR3 region of heavy and light chain variable regions when searched against memory B cell paired repertoire dataset

**Supplementary Table 3.** Inferred antibody germline genes and variable region analysis of represented in plasma EBOV GP-reactive antibodies

| Antibody number (EBOV-x) | V-gene (IGHV) | D-gene (IGHD) | J-gene (IGHJ) | Isotype* (IGH) | HCDR3                   | LCDR3       |
|--------------------------|---------------|---------------|---------------|----------------|-------------------------|-------------|
| 1130                     | 4-61*02       | 3-3*01        | 6*02          | M              | ARDSGLESLHEWLLPFYAMDV   | QQSHSSPYT   |
| 1131                     | 3-11*01       | 2-8*02        | 5*02          | G1             | VRGGDYTGVLGPEDHWFDP     | QQAYRTPYT   |
| 1132                     | 1-2*02        | 6-19*01       | 4*02          | G1             | ARDPTYSSGWRDY           | QQYYSMPIT   |
| 1133                     | 3-11*01       | 3-9*01        | 4*02          | G1             | AKGGIWF                 | HQYGRSPFT   |
| 1134                     | 3-30*02       | 2-2*02        | 4*02          | M              | AKFYSQYCSSTSCYILDY      | QQRSNRFT    |
| 1135                     | 3-15*01       | 1-14*01       | 5*02          | G1             | STGPGSLDLAGTPTFDL       | QQRTNRPLFT  |
| 1136                     | 3-48*01       | 3-10*01       | 4*02          | G1             | TREDAVTLVRGVLLGPHYFDS   | QQSYTRRT    |
| 1137                     | 4-61*02       | 2-2*01        | 4*02          | M              | AGFHCSGACKAEDY          | QQYYSAPRT   |
| 1138                     | 3-13*01       | 6-6*01        | 3*02          | G1             | ARAVHSSSAIFDI           | QQYGSPLT    |
| 1139                     | 5-51*03       | 3-22*01       | 6*02          | G1             | ARHPPHAGSYHHGMDV        | QQRSNWPHT   |
| 1140                     | 5-51*03       | 3-16*01       | 6*02          | D              | ARHGGGGTGGSVYYYGMDV     | QQYNNWPPTWT |
| 1141                     | 4-34*01       | 3-3*01        | 4*02          | G3             | ARARDYDFWTGYSRFFDH      | QQRSNWPCT   |
| 1142                     | 1-69*11       | 3-3*01        | 5*02          | G1             | VRDPISRNLDP             | QQYDNVPLT   |
| 1143                     | 4-59*01       | 5-18*01       | 6*03          | M              | ARGGYSYGFSPYYYMDV       | QKYNAPFT    |
| 1144                     | 4-34*01       | 5-18*01       | 6*03          | G2             | TRGRRIPFHYRGSFYGYEYYMDV | MQGRETPRT   |
| 1145                     | 3-73*01       | 1-14*01       | 4*02          | G1             | TSTGEEDY                | QKYNAPWT    |
| 1146                     | 4-61*02       | 2-2*01        | 6*02          | D              | AREPVGYCSSTSCYPYYYGMDV  | MQALQTPRT   |
| 1147                     | 3-53*01       | 3-3*01        | 6*02          | A1             | ARIYYYYGMDV             | QKYDSAPWT   |
| 1148                     | 3-48*03       | 5-18*01       | 4*02          | A1             | ARDTTWIRLDY             | QQRASWPPEIT |
| 1149                     | 3-21*02       | 3-9*01        | 6*03          | G1             | ARVPFDLLTGDYLLGYMDV     | QQRDKWPLT   |
| 1150                     | 4-39*07       | 3-10*01       | 4*02          | M              | ANPWFGAANDDY            | QQRSRWPLT   |
| 1151                     | 3-30*02       | 6-6*01        | 6*02          | M              | AKVGERNSSSIRWGYYYGMDV   | QQANSFPQT   |
| 1152                     | 3-30*02       | 3-22*01       | 3*02          | M              | ASLGYDDSSGYYPNLAFDI     | QKYNAPLT    |
| 1153                     | 4-59*01       | 6-25*01       | 3*02          | G1             | ARESSGYFMNAFDI          | QQYDSWPRT   |
| 1154                     | 1-2*02        | 3-3*01        | 3*02          | G3             | ARAATTFGVLSRANDAFDI     | QVWHSIGDQQV |
| 1155                     | 3-53*02       | 1-14*01       | 3*02          | G1             | ARGSGWNHVPGAFDI         | QQYNSYPWT   |
| 1156                     | 3-11*01       | 6-6*01        | 6*02          | M              | ARDKWDGVAARPHYGYMDV     | QQSYSTLCT   |
| 1157                     | 4-38-2*02     | 2-2*01        | 4*02          | G1             | ARDSPLVVSAANGLFDS       | QQYYSTPWT   |
| 1158                     | 1-69*08       | 2-21*02       | 4*02          | G1             | ARDLGPVTEKDDY           | QQYNSYPFT   |
| 1159                     | 3-48*03       | 3-22*01       | 4*02          | M              | ARARDPRTGSSGYLRY        | QQYDNLPLT   |
| 1160                     | 3-11*04       | 1-20*01       | 6*03          | G1             | ARVNGYNYGPLTGHYMDV      | QQTYSTPTWT  |
| 1161                     | 3-11*04       | 3-22*01       | 4*02          | G1             | ASTTWLYDSSGYPPDY        | QQRSNWPFT   |
| 1162                     | 3-7*01        | 1-26*01       | 6*04          | G1             | ARVPDHEGAKWDLWPPTYHYMDV | QSADRSGTYVV |
| 1163                     | 3-66*02       | 6-19*01       | 1*01          | G1             | ARLLSGPVFMEYFQH         | QQAKSFPLT   |
| 1164                     | 1-2*02        | 2-15*01       | 4*02          | G1             | ARDPTYISGGWRDY          | QQYYSIPIT   |
| 1165                     | 4-34*01       | 7-27*01       | 6*03          | G2             | ARRIQRGQTYWGFMDV        | MQALQTPIT   |
| 1166                     | 3-15*01       | 3-9*01        | 4*02          | G1             | TTDTLRDNYDDLTGYRGFYD    | QQRTSWPPLT  |
| 1167                     | 4-59*01       | 2-2*01        | 2*01          | M              | TSSSHYFYFDF             | QQYNNWLPWT  |
| 1168                     | 3-11*01       | 6-13*01       | 4*02          | M              | ARDRGSSWYQMGIFYD        | QQYYSTPRT   |
| 1169                     | 2-5*02        | 2-8*01        | 4*02          | G1             | GYFYDTRGVVYFDY          | QQAKSFPIT   |
| 1170                     | 1-69*14       | 1-26*01       | 6*03          | M              | ARTLFAGSYYYYMDV         | QQYNSYSQT   |
| 1171                     | 3-21*01       | 6-6*01        | 4*02          | G2             | ARGGSAARSPFDY           | QEYKTWT     |
| 1172                     | 1-69*11       | 6-13*01       | 4*02          | G1             | ARDVIGSHSGSSWAYVYFDY    | QQYGSPPRT   |
| 1173                     | 1-18*01       | 4-17*01       | 6*03          | G2             | ARLSHDFGDLGLFYFYMDV     | QYTNSFPLT   |
| 1174                     | 3-49*04       | 6-6*01        | 6*02          | G1             | ARVGTYSSSHIVYYYGMDV     | QQYDSSPWT   |
| 1175                     | 2-5*02        | 2-8*02        | 4*02          | G1             | GYFYDTRGHGVYFDY         | QQAKSYPIT   |
| 1176                     | 3-21*01       | 6-13*01       | 3*01          | G1             | ARDGPRTVPAAGIGDAFHV     | QQYYSIPWT   |
| 1177                     | 1-69*08       | 3-22*01       | 3*02          | G2             | ARPTEYHDSSGYLATHNLEAFDI | QQYGNSPVT   |
| 1178                     | 3-30*02       | 1-26*01       | 4*02          | D              | AKDRGSYRYFDY            | QQYNNWPRT   |
| 1179                     | 3-74*01       | 1-26*01       | 6*02          | D              | ARVSREHPYGMV            | QQSYSTPIT   |
| 1180                     | 3-21*01       | 3-9*01        | 4*02          | G1             | ARDSGRGGYKGTDY          | MQALQPLT    |
| 1181                     | 2-5*02        | 3-22*01       | 4*02          | G1             | GYFYDTSGHGVYFDY         | QQAKSYPIT   |

\* Heavy chain isotype identified from paired memory B cell antibody variable gene sequencing analysis

**Supplementary Table 4.** Binding and functional properties of individual mAbs determined by micro-scale screening assays

| Antibody number<br>(EBOV-x) | Micro-scale<br>purified antibody<br>concentration<br>( $\mu\text{g/mL}$ )* | GP binding by ELISA<br>(optical density at 450 nm)** |         |         | Binding to Jurkat cell-surface<br>displayed EBOV GP<br>( $\log_{10}$ MFI)** |               | EBOV<br>neutralization<br>(%)*** | Antibody-<br>mediated<br>cellular<br>phagocytosis<br>(score)*** |
|-----------------------------|----------------------------------------------------------------------------|------------------------------------------------------|---------|---------|-----------------------------------------------------------------------------|---------------|----------------------------------|-----------------------------------------------------------------|
|                             |                                                                            | EBOV GP                                              | BDBV GP | SUDV GP | Uncleaved                                                                   | + thermolysin |                                  |                                                                 |
| 1130                        | 408                                                                        | 3.5                                                  | 3.5     | 0.1     | 3.9                                                                         | 5.6           | 73                               | 95                                                              |
| 1131                        | 36                                                                         | 3.6                                                  | 3.3     | 0.2     | 4.2                                                                         | 4.8           | 10                               | 101                                                             |
| 1132                        | 48                                                                         | 3.6                                                  | 3.0     | 1.0     | 6.2                                                                         | 4.2           | 20                               | 110                                                             |
| 1133                        | 60                                                                         | 3.6                                                  | 3.6     | 3.6     | 3.9                                                                         | 6.3           | 16                               | 102                                                             |
| 1134                        | 84                                                                         | 3.5                                                  | 3.5     | 2.6     | 3.7                                                                         | 3.7           | 9                                | 106                                                             |
| 1135                        | 600                                                                        | 3.4                                                  | 2.4     | 3.2     | 4.0                                                                         | 3.8           | 17                               | 108                                                             |
| 1136                        | 60                                                                         | 3.6                                                  | 0.7     | 0.2     | 4.9                                                                         | 5.5           | 51                               | 97                                                              |
| 1137                        | 72                                                                         | 2.9                                                  | 0.9     | 0.3     | 4.1                                                                         | 3.9           | 31                               | 101                                                             |
| 1138                        | 84                                                                         | 3.5                                                  | 1.8     | 0.3     | 3.8                                                                         | 6.0           | 1                                | 123                                                             |
| 1139                        | 96                                                                         | 3.5                                                  | 3.5     | 1.9     | 4.5                                                                         | 6.2           | -9                               | 134                                                             |
| 1140                        | 24                                                                         | 1.4                                                  | 0.8     | 0.3     | 4.3                                                                         | 3.8           | -7                               | 153                                                             |
| 1141                        | 24                                                                         | 2.3                                                  | 2.1     | 0.7     | 5.1                                                                         | 4.8           | -7                               | 153                                                             |
| 1142                        | 108                                                                        | 1.8                                                  | 1.3     | 0.9     | 3.7                                                                         | 3.8           | -10                              | 121                                                             |
| 1143                        | 36                                                                         | 1.5                                                  | 1.0     | 0.3     | 3.6                                                                         | 3.6           | -6                               | 109                                                             |
| 1144                        | 48                                                                         | 2.6                                                  | 0.8     | 0.1     | 5.7                                                                         | 6.4           | 44                               | 136                                                             |
| 1145                        | 18                                                                         | 2.0                                                  | 0.6     | 0.1     | 4.1                                                                         | 3.8           | 17                               | 142                                                             |
| 1146                        | 168                                                                        | 2.5                                                  | 1.5     | 0.7     | 3.6                                                                         | 3.6           | -1                               | 77                                                              |
| 1147                        | 60                                                                         | 3.5                                                  | 3.4     | 3.4     | 3.7                                                                         | 4.4           | -9                               | 91                                                              |
| 1148                        | 36                                                                         | 2.9                                                  | 2.9     | 0.1     | 3.9                                                                         | 3.9           | -9                               | 167                                                             |
| 1149                        | 108                                                                        | 3.7                                                  | 3.6     | 0.2     | 5.2                                                                         | 5.5           | 11                               | 164                                                             |
| 1150                        | 48                                                                         | 2.2                                                  | 1.4     | 0.7     | 3.6                                                                         | 3.8           | -10                              | 171                                                             |
| 1151                        | 24                                                                         | 3.4                                                  | 2.1     | 0.3     | 3.6                                                                         | 3.9           | -10                              | 140                                                             |
| 1152                        | 36                                                                         | 3.6                                                  | 3.5     | 0.1     | 4.6                                                                         | 3.9           | 1                                | 140                                                             |
| 1153                        | 30                                                                         | 3.6                                                  | 3.6     | 0.2     | 4.6                                                                         | 5.1           | 12                               | 121                                                             |
| 1154                        | 36                                                                         | 3.5                                                  | 3.5     | 0.1     | 3.7                                                                         | 4.0           | 7                                | 103                                                             |
| 1155                        | 36                                                                         | 0.1                                                  | 0.1     | 0.1     | 3.6                                                                         | 3.7           | -8                               | 122                                                             |
| 1156                        | 72                                                                         | 0.3                                                  | 0.1     | 0.1     | 3.8                                                                         | 3.6           | -10                              | 53                                                              |
| 1157                        | 12                                                                         | 3.5                                                  | 1.3     | 0.4     | 4.3                                                                         | 3.7           | -9                               | 110                                                             |
| 1158                        | 36                                                                         | 3.3                                                  | 2.7     | 0.1     | 4.0                                                                         | 4.0           | -11                              | 99                                                              |
| 1159                        | 72                                                                         | 1.9                                                  | 1.0     | 0.1     | 3.6                                                                         | 3.6           | -14                              | 62                                                              |
| 1160                        | 36                                                                         | 3.6                                                  | 3.5     | 0.1     | 5.1                                                                         | 5.6           | -4                               | 144                                                             |
| 1161                        | 42                                                                         | 3.6                                                  | 3.6     | 0.2     | 4.9                                                                         | 3.9           | 14                               | 148                                                             |
| 1162                        | 48                                                                         | 2.8                                                  | 0.3     | 0.1     | 4.9                                                                         | 5.5           | 3                                | 92                                                              |
| 1163                        | 36                                                                         | 3.6                                                  | 3.5     | 0.1     | 5.3                                                                         | 5.6           | 0                                | 154                                                             |
| 1164                        | 72                                                                         | 3.6                                                  | 0.1     | 0.2     | 6.1                                                                         | 4.2           | 80                               | 165                                                             |
| 1165                        | 168                                                                        | 0.4                                                  | 0.1     | 0.1     | 4.5                                                                         | 3.9           | -12                              | 174                                                             |
| 1166                        | 120                                                                        | 3.6                                                  | 3.5     | 0.1     | 5.6                                                                         | 5.5           | 10                               | 159                                                             |
| 1167                        | 24                                                                         | 2.2                                                  | 1.8     | 0.1     | 3.6                                                                         | 3.7           | -12                              | 195                                                             |
| 1168                        | 2                                                                          | 1.1                                                  | 0.5     | 0.1     | 3.7                                                                         | 4.0           | -10                              | 145                                                             |
| 1169                        | 198                                                                        | 3.6                                                  | 3.2     | 0.1     | 5.9                                                                         | 5.5           | 29                               | 126                                                             |
| 1170                        | 24                                                                         | 0.4                                                  | 0.1     | 0.1     | 3.9                                                                         | 3.9           | 17                               | 67                                                              |
| 1171                        | 24                                                                         | 2.8                                                  | 1.3     | 0.2     | 3.6                                                                         | 4.0           | 96                               | 162                                                             |
| 1172                        | 72                                                                         | 3.6                                                  | 3.6     | 2.8     | 5.1                                                                         | 5.8           | -12                              | 101                                                             |
| 1173                        | 24                                                                         | 3.1                                                  | 3.6     | 0.6     | 3.7                                                                         | 5.2           | -12                              | 168                                                             |
| 1174                        | 12                                                                         | 3.5                                                  | 3.5     | 0.1     | 4.7                                                                         | 5.4           | -10                              | 194                                                             |
| 1175                        | 36                                                                         | 3.6                                                  | 3.1     | 0.1     | 4.9                                                                         | 4.7           | 45                               | 191                                                             |
| 1176                        | 60                                                                         | 3.6                                                  | 1.0     | 0.1     | 5.1                                                                         | 5.9           | 98                               | 169                                                             |
| 1177                        | 96                                                                         | 3.6                                                  | 3.6     | 2.4     | 5.3                                                                         | 5.6           | 96                               | 159                                                             |
| 1178                        | 36                                                                         | 0.4                                                  | 0.1     | 0.1     | 4.0                                                                         | 3.9           | 6                                | 64                                                              |
| 1179                        | 60                                                                         | 3.2                                                  | 0.1     | 0.1     | 4.1                                                                         | 4.1           | 10                               | 118                                                             |
| 1180                        | 60                                                                         | 3.6                                                  | 0.1     | 0.1     | 5.6                                                                         | 6.3           | 20                               | 137                                                             |
| 1181                        | 48                                                                         | 3.6                                                  | 0.1     | 0.1     | 5.8                                                                         | 5.4           | 28                               | 159                                                             |

| Controls       |     |     |     |     |     |     |     |     |
|----------------|-----|-----|-----|-----|-----|-----|-----|-----|
| EBOV-520       | 43  | 3.6 | 3.6 | 2.1 | 4.6 | 6.4 | 49  | 172 |
| 13C6 (5 µg/mL) | N/A | N/A | N/A | N/A | 5   | 3.6 | N/A | 186 |
| CO5 (Flu HA)   | 66  | 0.2 | 0.1 | 0.1 | 3.7 | 4.0 | -10 | 63  |

\* each purified mAb had a total volume of 100 µL

\*\* each mAb was tested at a single 1:10 dilution

\*\*\* each mAb was tested at a single 1:6 dilution
